# Supplementary material for: Regulatory roles of osteopontin in human lung cancer cell epithelial‐to‐mesenchymal transitions and responses
Source: PubMed Central journal article supplement (PMC8265167; doi:10.1002/ctm2.486), 2021-07-08
Supplement: CTM2-11-e486-s001.pdf [file CTM2-11-e486-s001.pdf]

---

**Supplementary Table 1:** Sequences mentioned in the article

| Name        | Sequences                          |                                    |
|-------------|------------------------------------|------------------------------------|
|             | Forward primer                     | Reverse primer                     |
| OPN         | 5'- AGTGATTTGCTTTTGCCTCCT-3'       | 5'- GCTTTCGTTGGACTTACTTGGA-3'      |
| E-cadherin  | 5'-CCCACCACGTACAAGGGTC-3'          | 5'-CTGGGGTATTGGGGGCATC-3'          |
| Vimentin    | 5'-CGCCAGATGCGTGAAATGG-3'          | 5'-ACCAGAGGGAGTGAATCCAGA-3'        |
| Snail       | 5'-AATCGGAAGC CTA ACTACAGCG-3'     | 5'-GTCCCAGATGAGCATTGGCA-3'         |
| Twist       | 5'-GTCCGCAGTCTTACGAGGAG-3'         | 5'-GCTTGAGGGTC TGAATCTTGCT-3'      |
| GAPDH       | 5'-GATGCTGGCGCTGAGTACG-3'          | 5'-GCTAAGCAGTTGGTGGTGC-3'          |
| siRNA- OPN1 | 5'--GTTTCACAGCCACAAGGAC--3'        | 5'--GTCCTTGTGGCTGTGAAAC--3'        |
| siRNA-OPN2  | 5'--GCGAGGAGTTGAATGGTGCATACAA--3'  | 5'--TTGTATGCACCATTCAACTCCTCGC--3'  |
| siRNA-OPN3  | 5'--CGACTCTGATGATGTAGATGACACT--3'  | 5'—AGTGTCATCTACATCATCAGAGTCG--3'   |
| siRNA-NC    | 5'--CACTGAACTACTCATGGTGTGAGAT --3' | 5'--ATCTCACACCATGAGTAGTCTAGTG --3' |
| PIK3CA      | 5'-GGGATGATTTACGGCAAGATA-3'        | 5'-CCACACAGTCACCGATTGA-3'          |

---

|         |                              |                            |
|---------|------------------------------|----------------------------|
| PIK3CB  | 5'-TGCGACAGATGAGTGATGAA-3'   | 5'-TCCTCCGATTACCAAGTGCT-3' |
| PIK3CD  | 5'-GCCAACATCCAACTCAACAA-3'   | 5'-CCACACAATAGCCAGCACAG-3' |
| PIK3C2A | 5'-GATTACCTGGGCCTTCCAC-3'    | 5'-AGTGGGCATTCTTGGATTGA-3' |
| PIK3C2B | 5'-TCCACCTTGAACCTACCTCGTC-3' | 5'-AAGTCTCCATCAGCCAGCAG-3' |
| PIK3C2G | 5'-CTCCTGGCATCAAGTTAGCA-3'   | 5'-TCTGGAATCATCAGCACCAT-3' |
| PIK3C3  | 5'-ATCCCGTTGCCTTTAGAACC-3'   | 5'-TGCCTCCATCTTCCGTCTTA-3' |
| PIK3R1  | 5'-GGACGGCGAAGTAAAGCAT-3'    | 5'-TGACATTGAGGGAGTCGTTG-3' |
| PIK3R2  | 5'-GATGGGCACTATGGCTTCTC-3'   | 5'-TGCTGGTATTTGGACACAGG-3' |
| PIK3R3  | 5'-AGCACAACGACTCCCTCAAC-3'   | 5'-AAATGCCAGAGAACCACCTC-3' |
| PIK3R4  | 5'-TGGCATTGTGTCCCTTTGT-3'    | 5'-TGCTGGATGAGTTGCTGAAG-3' |
| TP53    | 5'-TGAAGCTCCCAGAATGCCAG-3'   | 5'-GCTGCCCTGGTAGGTTTTCT-3' |

siRNA-OPN-1, -2, -3 are three kinds of OPN-siRNAs targeted on different sequences. siRNA-NC is a negative control siRNA with the same nucleotide composition but which lacks significant sequence homology to OPN.
